# Supplementary material
Source: Springer Nature journal article supplement (https://www.springermedizin.de/resource/supplementary/12885_2013_4097_MOESM3_ESM.pdf/9465330)

# Adenoviral vector infected HepG2 cells

miR-21 Relative transcripts

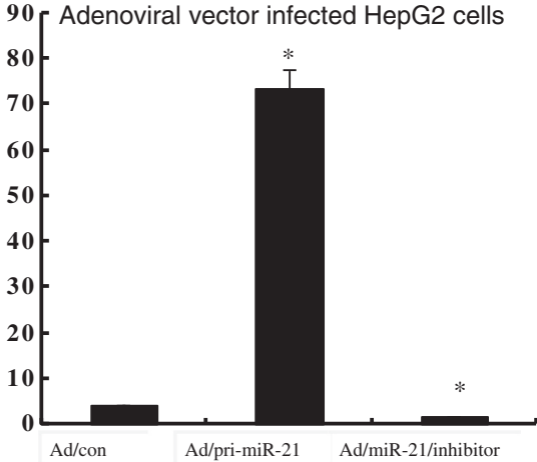

Supplement: MOESM3 [file 9465330]
